# Supplementary material
Source: PubMed Central journal article supplement (PMC6848585)
Supplement: 11606_2019_5336_MOESM1_ESM.pdf [file 11606_2019_5336_MOESM1_ESM.pdf]

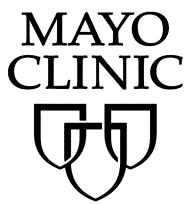

# MEDICAL PRACTICE SURVEY

We thank you in advance for completing this questionnaire. When you have finished, please mail it in the enclosed envelope.

For your visit with Precode 3 (PROVNAM1)

For your visit on Precode 4 (SVC\_DATE)

## BACKGROUND QUESTIONS

- 1. If someone other than the patient is completing the survey, please check here: .....
- 2. Was this your first visit here? .....  Yes  No
- 3. How many **minutes** did you wait after your scheduled appointment time before you were called to an exam room? 

|  |  |  |
|--|--|--|
|  |  |  |
|--|--|--|

 minutes

- 4. How many **minutes** did you wait in the exam room before you were seen by a doctor, physician assistant (PA), nurse practitioner (NP), or midwife? ..... 

|  |  |  |
|--|--|--|
|  |  |  |
|--|--|--|

 minutes

**INSTRUCTIONS:** Please rate the services you received from our practice. Select the response that best describes your experience. If a question does not apply to you, please skip to the next question. Space is provided for you to comment on good or bad things that may have happened to you.

Please use black or blue ink to fill in the circle completely.  
Example: ●

|               | very poor | poor     | fair     | good     | very good |
|---------------|-----------|----------|----------|----------|-----------|
| <b>ACCESS</b> | <b>1</b>  | <b>2</b> | <b>3</b> | <b>4</b> | <b>5</b>  |

- |                                                             |                       |                       |                       |                       |                       |
|-------------------------------------------------------------|-----------------------|-----------------------|-----------------------|-----------------------|-----------------------|
| 1. Ease of getting through to the clinic on the phone ..... | <input type="radio"/> |
| 2. Convenience of our office hours .....                    | <input type="radio"/> |
| 3. Ease of scheduling your appointment .....                | <input type="radio"/> |
| 4. Courtesy of staff in the registration area .....         | <input type="radio"/> |

**Comments** (describe good or bad experience): \_\_\_\_\_  
\_\_\_\_\_  
\_\_\_\_\_

|                                  | very poor | poor     | fair     | good     | very good |
|----------------------------------|-----------|----------|----------|----------|-----------|
| <b>MOVING THROUGH YOUR VISIT</b> | <b>1</b>  | <b>2</b> | <b>3</b> | <b>4</b> | <b>5</b>  |

- |                                                             |                       |                       |                       |                       |                       |
|-------------------------------------------------------------|-----------------------|-----------------------|-----------------------|-----------------------|-----------------------|
| 1. Degree to which you were informed about any delays ..... | <input type="radio"/> |
| 2. Wait time at clinic (from arriving to leaving) .....     | <input type="radio"/> |

**Comments** (describe good or bad experience): \_\_\_\_\_  
\_\_\_\_\_  
\_\_\_\_\_

|                        | very poor | poor     | fair     | good     | very good |
|------------------------|-----------|----------|----------|----------|-----------|
| <b>NURSE/ASSISTANT</b> | <b>1</b>  | <b>2</b> | <b>3</b> | <b>4</b> | <b>5</b>  |

- |                                                                   |                       |                       |                       |                       |                       |
|-------------------------------------------------------------------|-----------------------|-----------------------|-----------------------|-----------------------|-----------------------|
| 1. Friendliness/courtesy of the nurse/assistant .....             | <input type="radio"/> |
| 2. Concern the nurse/assistant showed for your problem .....      | <input type="radio"/> |
| 3. Nurse/assistant promptness in returning your phone calls ..... | <input type="radio"/> |
| 4. Education provided by the nurse (if any) .....                 | <input type="radio"/> |

**Comments** (describe good or bad experience): \_\_\_\_\_  
\_\_\_\_\_  
\_\_\_\_\_

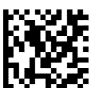

continued...

|          |          |          |          |          |      |
|----------|----------|----------|----------|----------|------|
| very     |          |          |          |          | very |
| poor     | poor     | fair     | good     | good     |      |
| <b>1</b> | <b>2</b> | <b>3</b> | <b>4</b> | <b>5</b> |      |

**CARE PROVIDER**

**DURING YOUR VISIT, YOUR CARE WAS PROVIDED PRIMARILY BY A DOCTOR, PHYSICIAN ASSISTANT (PA), NURSE PRACTITIONER (NP), OR MIDWIFE. PLEASE ANSWER THE FOLLOWING QUESTIONS WITH THAT HEALTH CARE PROVIDER IN MIND.**

- |                                                                                         |                       |                       |                       |                       |                       |
|-----------------------------------------------------------------------------------------|-----------------------|-----------------------|-----------------------|-----------------------|-----------------------|
| 1. Friendliness/courtesy of the care provider .....                                     | <input type="radio"/> |
| 2. Explanations the care provider gave you about your problem or condition .....        | <input type="radio"/> |
| 3. Concern the care provider showed for your questions or worries .....                 | <input type="radio"/> |
| 4. Care provider's efforts to include you in decisions about your treatment .....       | <input type="radio"/> |
| 5. Information the care provider gave you about medications (if any) .....              | <input type="radio"/> |
| 6. Instructions the care provider gave you about follow-up care (if any) .....          | <input type="radio"/> |
| 7. Degree to which care provider talked with you using words you could understand ..... | <input type="radio"/> |
| 8. Amount of time the care provider spent with you .....                                | <input type="radio"/> |
| 9. Your confidence in this care provider .....                                          | <input type="radio"/> |
| 10. Likelihood of your recommending this care provider to others .....                  | <input type="radio"/> |

**Comments** (describe good or bad experience): \_\_\_\_\_  
 \_\_\_\_\_  
 \_\_\_\_\_

**PERSONAL ISSUES**

|          |          |          |          |          |      |
|----------|----------|----------|----------|----------|------|
| very     |          |          |          |          | very |
| poor     | poor     | fair     | good     | good     |      |
| <b>1</b> | <b>2</b> | <b>3</b> | <b>4</b> | <b>5</b> |      |

- |                                                                                        |                       |                       |                       |                       |                       |
|----------------------------------------------------------------------------------------|-----------------------|-----------------------|-----------------------|-----------------------|-----------------------|
| 1. How well staff protected your safety (by washing hands, wearing gloves, etc.) ..... | <input type="radio"/> |
| 2. Our sensitivity to your needs .....                                                 | <input type="radio"/> |
| 3. Our concern for your privacy .....                                                  | <input type="radio"/> |
| 4. Cleanliness of our practice .....                                                   | <input type="radio"/> |
| 5. Response to concerns/complaints made during your visit .....                        | <input type="radio"/> |
| 6. How well your (the patient's) pain was controlled .....                             | <input type="radio"/> |

**Comments** (describe good or bad experience): \_\_\_\_\_  
 \_\_\_\_\_  
 \_\_\_\_\_

**OVERALL ASSESSMENT**

|          |          |          |          |          |      |
|----------|----------|----------|----------|----------|------|
| very     |          |          |          |          | very |
| poor     | poor     | fair     | good     | good     |      |
| <b>1</b> | <b>2</b> | <b>3</b> | <b>4</b> | <b>5</b> |      |

- |                                                                 |                       |                       |                       |                       |                       |
|-----------------------------------------------------------------|-----------------------|-----------------------|-----------------------|-----------------------|-----------------------|
| 1. How well the staff worked together to care for you .....     | <input type="radio"/> |
| 2. Likelihood of your recommending our practice to others ..... | <input type="radio"/> |
| 3. Overall rating of care received during your visit .....      | <input type="radio"/> |

**Comments** (describe good or bad experience): \_\_\_\_\_  
 \_\_\_\_\_  
 \_\_\_\_\_

Patient's Name: (optional) \_\_\_\_\_

Telephone Number: (optional) \_\_\_\_\_

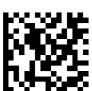

Online Appendix 2

**Mixed Effects\* Regression Measuring Impact of Hourly Appointment Time on the Likelihood of a patient recommending our practice to others**

|                                                          | <b>Estimate</b> | <b>p-value</b>   |
|----------------------------------------------------------|-----------------|------------------|
| <b>Hour of Appointment</b>                               |                 | <b>0.0012</b>    |
| 9:00-9:59AM vs 8:00-8:59AM                               | -0.01833        | 0.5641           |
| 10:00-10:59AM vs 8:00-8:59AM                             | -0.02943        | 0.2923           |
| 11:00-11:59AM vs 8:00-8:59AM                             | -0.09432        | 0.008            |
| 1:00-1:59PM vs 8:00-8:59AM                               | -0.02549        | 0.3727           |
| 2:00-2:59PM vs 8:00-8:59AM                               | -0.09097        | 0.0012           |
| 3:00-3:59PM vs 8:00-8:59AM                               | -0.09829        | 0.0011           |
| 4:00-4:59PM vs 8:00-8:59AM                               | -0.09076        | 0.0103           |
| <b>Provider Type</b>                                     |                 | <b>0.1338</b>    |
| NP/PA vs Staff MD/PhD                                    | -0.00498        | 0.8484           |
| Resident/Fellow vs Staff MD/PhD                          | -0.05269        | 0.0464           |
| <b>Patient Sex</b>                                       |                 | <b>0.1761</b>    |
| F vs M                                                   | -0.02304        |                  |
| <b>Patient Age</b>                                       | <b>0.002682</b> | <b>&lt;.0001</b> |
| <b>Patient Marital Status</b>                            |                 | <b>0.769</b>     |
| Divorced vs Married                                      | -0.03233        | 0.2486           |
| Legally Separated vs Married                             | -0.2034         | 0.4706           |
| Life Partner vs Married                                  | 0.04118         | 0.7994           |
| Single vs Married                                        | -0.0255         | 0.3306           |
| Widowed vs Married                                       | -0.00722        | 0.7952           |
| <b>Charlson Comorbidity Index</b>                        |                 | <b>0.9529</b>    |
| >3 vs <=3                                                | -0.00174        |                  |
| <b>Patient Education</b>                                 |                 | <b>0.0152</b>    |
| Some high school vs High school grad or GED              | 0.009558        | 0.8739           |
| 4-year college vs High school grad or GED                | 0.07362         | 0.0037           |
| 8th grade or less vs High school grad or GED             | 0.03967         | 0.5853           |
| Post graduate studies vs High school grad or GED         | 0.06894         | 0.0038           |
| Some college or 2 year degree vs High school grad or GED | 0.0208          | 0.3601           |

\* Adjusted for Random Provider effect

Online Appendix 2

**Mixed Effects\* Regression with Interactions Measuring Impact of Hourly Appointment Time on the Likelihood of a patient recommending our practice to others**

|                                                          |                 |    | Estimate | p-value |
|----------------------------------------------------------|-----------------|----|----------|---------|
| <b>Hour overall effect</b>                               |                 |    |          |         |
| <b>0.5214</b>                                            |                 |    |          |         |
| 9:00-9:59AM vs 8:00-8:59AM                               |                 |    | -0.1229  | 0.5631  |
| 10:00-10:59AM vs 8:00-8:59AM                             |                 |    | -0.07922 | 0.6827  |
| 11:00-11:59AM vs 8:00-8:59AM                             |                 |    | -0.3962  | 0.0978  |
| 1:00-1:59PM vs 8:00-8:59AM                               |                 |    | -0.1087  | 0.5723  |
| 2:00-2:59PM vs 8:00-8:59AM                               |                 |    | -0.2898  | 0.1251  |
| 3:00-3:59PM vs 8:00-8:59AM                               |                 |    | -0.5132  | 0.01    |
| 4:00-4:59PM vs 8:00-8:59AM                               |                 |    | -0.2277  | 0.3232  |
| <b>Provider Type overall effect</b>                      |                 |    |          |         |
| <b>0.9674</b>                                            |                 |    |          |         |
| NP/PA vs Staff MD/PhD                                    |                 |    | 0.02303  | 0.7191  |
| Resident/Fellow vs Staff MD/PhD                          |                 |    | -0.06462 | 0.481   |
| <b>Patient sex overall effect</b>                        |                 |    |          |         |
| <b>-0.04752</b>                                          |                 |    |          |         |
| <b>0.3248</b>                                            |                 |    |          |         |
| <b>Patient age overall effect</b>                        |                 |    |          |         |
| <b>0.001067</b>                                          |                 |    |          |         |
| <b>&lt;0.0001</b>                                        |                 |    |          |         |
| <b>Patient Marital Status</b>                            |                 |    |          |         |
| <b>0.9083</b>                                            |                 |    |          |         |
| Divorced vs Married                                      |                 |    | -0.1255  | 0.097   |
| Legally Separated vs Married                             |                 |    | 0.33     | 0.4069  |
| Life Partner vs Married                                  |                 |    | 0.2933   | 0.458   |
| Single vs Married                                        |                 |    | -0.1325  | 0.0484  |
| Widowed vs Married                                       |                 |    | -0.01633 | 0.8318  |
| <b>Charlson Comorbidity Index</b>                        |                 |    |          |         |
| <b>0.932</b>                                             |                 |    |          |         |
| >3 vs <=3                                                |                 |    | 0.1204   | 0.3361  |
| <b>Patient Education</b>                                 |                 |    |          |         |
| <b>0.0026</b>                                            |                 |    |          |         |
| Some high school vs High school grad or GED              |                 |    | 0.1416   | 0.4943  |
| 4-year college vs High school grad or GED                |                 |    | 0.08517  | 0.2059  |
| 8th grade or less vs High school grad or GED             |                 |    | 0.1361   | 0.6389  |
| Post graduate studies vs High school grad or GED         |                 |    | 0.04572  | 0.4706  |
| Some college or 2 year degree vs High school grad or GED |                 |    | -0.01472 | 0.8113  |
| <b>Hour*provider_type overall effect</b>                 |                 |    |          |         |
| <b>0.9636</b>                                            |                 |    |          |         |
| hour*provider_type                                       | NP/PA           | 9  | -0.0075  | 0.935   |
| hour*provider_type                                       | Resident/Fellow | 9  | 0.1202   | 0.3069  |
| hour*provider_type                                       | NP/PA           | 10 | -0.05466 | 0.5207  |
| hour*provider_type                                       | Resident/Fellow | 10 | -0.01828 | 0.8722  |
| hour*provider_type                                       | NP/PA           | 11 | -0.04311 | 0.6794  |
| hour*provider_type                                       | NP/PA           | 13 | -0.05213 | 0.5483  |
| hour*provider_type                                       | Resident/Fellow | 13 | -0.00292 | 0.9786  |
| hour*provider_type                                       | NP/PA           | 14 | -0.03475 | 0.6733  |
| hour*provider_type                                       | Resident/Fellow | 14 | 0.01478  | 0.8887  |
| hour*provider_type                                       | NP/PA           | 15 | -0.01459 | 0.8683  |
| hour*provider_type                                       | Resident/Fellow | 15 | 0.03933  | 0.7155  |
| hour*provider_type                                       | NP/PA           | 16 | 0.05229  | 0.5911  |
| hour*provider_type                                       | Resident/Fellow | 16 | 0.2613   | 0.2146  |
| <b>Hour*Patient sex overall effect</b>                   |                 |    |          |         |
| <b>0.4174</b>                                            |                 |    |          |         |
|                                                          | F               | 9  | -0.01659 | 0.8123  |

Online Appendix 2

|                                           |    |          |               |
|-------------------------------------------|----|----------|---------------|
| F                                         | 10 | -0.04793 | 0.4353        |
| F                                         | 11 | 0.04566  | 0.5585        |
| F                                         | 13 | 0.0809   | 0.1866        |
| F                                         | 14 | 0.04771  | 0.4396        |
| F                                         | 15 | 0.07318  | 0.2668        |
| F                                         | 16 | 0.0528   | 0.504         |
| <b>Hour*Age overall effect</b>            |    |          | <b>0.7721</b> |
|                                           | 9  | 0.001078 | 0.6765        |
|                                           | 10 | 0.002038 | 0.3891        |
|                                           | 11 | 0.002717 | 0.3743        |
|                                           | 13 | -0.00013 | 0.9575        |
|                                           | 14 | 0.002548 | 0.2787        |
|                                           | 15 | 0.00365  | 0.1295        |
|                                           | 16 | 0.001822 | 0.5291        |
| <b>Hour*Marital status overall effect</b> |    |          | <b>0.2155</b> |
| Divorced                                  | 9  | 0.1294   | 0.2852        |
| Single                                    | 9  | 0.2211   | 0.0542        |
| Widowed                                   | 9  | -0.04777 | 0.6902        |
| Divorced                                  | 10 | 0.06977  | 0.4986        |
| Life Partner                              | 10 | -0.1151  | 0.8382        |
| Single                                    | 10 | 0.08535  | 0.3652        |
| Widowed                                   | 10 | -0.04999 | 0.6153        |
| Divorced                                  | 11 | 0.1744   | 0.1515        |
| Life Partner                              | 11 | -1.1001  | 0.0533        |
| Single                                    | 11 | 0.1684   | 0.1708        |
| Widowed                                   | 11 | 0.1495   | 0.241         |
| Divorced                                  | 13 | 0.1778   | 0.0812        |
| Life Partner                              | 13 | -0.1233  | 0.7877        |
| Single                                    | 13 | 0.2582   | 0.0054        |
| Widowed                                   | 13 | -0.03766 | 0.7323        |
| Divorced                                  | 14 | 0.03334  | 0.7435        |
| Legally Separated                         | 14 | -1.0187  | 0.087         |
| Life Partner                              | 14 | 0        |               |
| Single                                    | 14 | 0.03256  | 0.7332        |
| Widowed                                   | 14 | 0.02239  | 0.8244        |
| Divorced                                  | 15 | 0.07476  | 0.492         |
| Legally Separated                         | 15 | 0        |               |
| Single                                    | 15 | 0.1047   | 0.2924        |
| Widowed                                   | 15 | -0.00323 | 0.9768        |
| Divorced                                  | 16 | 0.2396   | 0.0976        |
| Single                                    | 16 | -0.02945 | 0.7932        |
| Widowed                                   | 16 | 0.005159 | 0.9711        |
| <b>Hour*CCI overall effect</b>            |    |          | <b>0.5034</b> |
| >3                                        | 9  | -0.2464  | 0.1184        |
| >3                                        | 10 | -0.228   | 0.1156        |
| >3                                        | 11 | -0.09951 | 0.512         |
| >3                                        | 13 | -0.1017  | 0.4839        |
| >3                                        | 14 | -0.1032  | 0.4702        |
| >3                                        | 15 | -0.1589  | 0.2936        |
| >3                                        | 16 | -0.0031  | 0.9849        |

## Online Appendix 2

|                                      |                                              |    |          |               |
|--------------------------------------|----------------------------------------------|----|----------|---------------|
| <b>Hour*Education overall effect</b> |                                              |    |          | <b>0.0618</b> |
|                                      | Some high school,<br>but did not<br>graduate | 9  | 0.02228  | 0.9367        |
|                                      | 4-year college<br>graduate                   | 9  | 0.02332  | 0.8319        |
|                                      | 8th grade or less                            | 9  | -0.4694  | 0.2576        |
|                                      | Post graduate<br>studies                     | 9  | -0.05224 | 0.6051        |
|                                      | Some College or 2<br>year degree             | 9  | 0.07845  | 0.4181        |
|                                      | Some high school,<br>but did not<br>graduate | 10 | -0.221   | 0.4247        |
|                                      | 4-year college<br>graduate                   | 10 | -0.1472  | 0.1124        |
|                                      | 8th grade or less                            | 10 | -0.07905 | 0.8234        |
|                                      | Post graduate<br>studies                     | 10 | -0.02886 | 0.7404        |
|                                      | Some College or 2<br>year degree             | 10 | -0.00068 | 0.9935        |
|                                      | Some high school,<br>but did not<br>graduate | 11 | -0.2234  | 0.3834        |
|                                      | 4-year college<br>graduate                   | 11 | 0.1511   | 0.2181        |
|                                      | 8th grade or less                            | 11 | -0.3518  | 0.3939        |
|                                      | Post graduate<br>studies                     | 11 | 0.1503   | 0.1596        |
|                                      | Some College or 2<br>year degree             | 11 | 0.006791 | 0.9469        |
|                                      | Some high school,<br>but did not<br>graduate | 13 | -0.0618  | 0.8123        |

## Online Appendix 2

|                                        |    |          |        |
|----------------------------------------|----|----------|--------|
| 4-year college graduate                | 13 | -0.02634 | 0.7874 |
| 8th grade or less                      | 13 | -0.4849  | 0.159  |
| Post graduate studies                  | 13 | 0.03766  | 0.6713 |
| Some College or 2 year degree          | 13 | 0.04325  | 0.6252 |
| Some high school, but did not graduate | 14 | -0.127   | 0.6603 |
| 4-year college graduate                | 14 | -0.04129 | 0.6474 |
| 8th grade or less                      | 14 | 0.1044   | 0.7455 |
| Post graduate studies                  | 14 | 0.08502  | 0.3162 |
| Some College or 2 year degree          | 14 | -0.04849 | 0.5486 |
| Some high school, but did not graduate | 15 | 0.07182  | 0.7696 |
| 4-year college graduate                | 15 | 0.1043   | 0.2764 |
| 8th grade or less                      | 15 | 0.0273   | 0.9354 |
| Post graduate studies                  | 15 | 0.04428  | 0.6396 |
| Some College or 2 year degree          | 15 | 0.2208   | 0.0125 |
| Some high school, but did not graduate | 16 | -1.1158  | 0.002  |
| 4-year college graduate                | 16 | -0.02441 | 0.8213 |

## Online Appendix 2

|                               |    |          |        |
|-------------------------------|----|----------|--------|
| 8th grade or less             | 16 | 0.04015  | 0.9219 |
| Post graduate studies         | 16 | -0.1074  | 0.3213 |
| Some College or 2 year degree | 16 | -0.06698 | 0.5113 |

---

\* Adjusted for Random Provider effect



Online Appendix 2

**Mixed Effects\* Regression Adjusted for Total Wait Time Measuring Impact of Hourly Appointment Time on the Likelihood of a patient recommending our practice to others**

|                                                          | Estimate        | p-value          |
|----------------------------------------------------------|-----------------|------------------|
| <b>Hour of Appointment</b>                               |                 | <b>0.0068</b>    |
| 9:00-9:59AM vs 8:00-8:59AM                               | -0.00807        | 0.7973           |
| 10:00-10:59AM vs 8:00-8:59AM                             | -0.01168        | 0.6754           |
| 11:00-11:59AM vs 8:00-8:59AM                             | -0.07824        | 0.0269           |
| 1:00-1:59PM vs 8:00-8:59AM                               | -0.00938        | 0.7428           |
| 2:00-2:59PM vs 8:00-8:59AM                               | -0.07402        | 0.0081           |
| 3:00-3:59PM vs 8:00-8:59AM                               | -0.07928        | 0.0081           |
| 4:00-4:59PM vs 8:00-8:59AM                               | -0.07405        | 0.0361           |
| <b>Provider Type</b>                                     |                 | <b>0.0852</b>    |
| NP/PA vs Staff MD/PhD                                    | -0.00845        | 0.743            |
| Resident/Fellow vs Staff MD/PhD                          | -0.05836        | 0.0268           |
| <b>Patient Sex</b>                                       |                 | <b>0.2237</b>    |
| F vs M                                                   | -0.02059        |                  |
| <b>Patient Age</b>                                       | <b>0.002708</b> | <b>&lt;.0001</b> |
| <b>Patient Marital Status</b>                            |                 | <b>0.7032</b>    |
| Divorced vs Married                                      | -0.04095        | 0.1425           |
| Legally Separated vs Married                             | -0.1326         | 0.6303           |
| Life Partner vs Married                                  | 0.04278         | 0.7868           |
| Single vs Married                                        | -0.02241        | 0.393            |
| Widowed vs Married                                       | -0.01617        | 0.565            |
| <b>Charlson Comorbidity Index</b>                        |                 | <b>0.6484</b>    |
| >3 vs <=3                                                | 0.01354         |                  |
| <b>Patient Education</b>                                 |                 | <b>0.0452</b>    |
| Some high school vs High school grad or GED              | 0.06771         | 0.2656           |
| 4-year college vs High school grad or GED                | 0.06371         | 0.0121           |
| 8th grade or less vs High school grad or GED             | 0.09349         | 0.2244           |
| Post graduate studies vs High school grad or GED         | 0.04682         | 0.0496           |
| Some college or 2 year degree vs High school grad or GED | 0.008413        | 0.7115           |
| <b>Total Wait Time</b>                                   | <b>-0.00589</b> | <b>&lt;.0001</b> |

\* Adjusted for Random Provider effect
